# Supplementary material for: The Sm Complex Is Required for the Processing of Non-Coding RNAs by the Exosome
Source: PLOS journal article supplement (doi:10.1371/journal.pone.0065606), 2013-06-06
Supplement: S6 (10.1371/journal.pone.0065606.s006) [file journal.pone.0065606.s006]

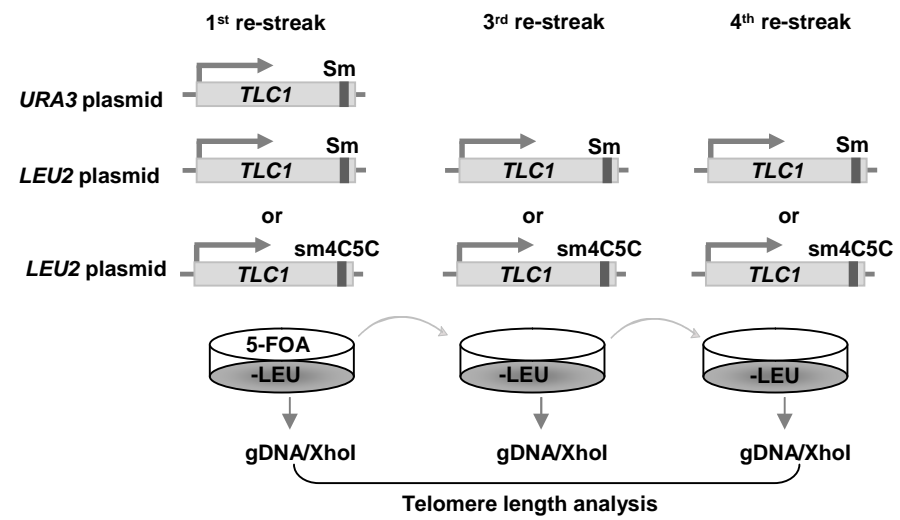

Figure S6, Coy et al.
